# Supplementary material for: Genetic patterns in Mugil cephalus and implications for fisheries and aquaculture management
Source: PubMed Central journal article supplement (PMC7859195; doi:10.1038/s41598-021-82515-7), 2021-02-03
Supplement: 41598_2021_82515_MOESM1_ESM.pdf [file 41598_2021_82515_MOESM1_ESM.pdf]

Online Resource 1

P. Cossu<sup>1,2</sup>, L. Mura<sup>3</sup>, F. Scarpa<sup>1,2</sup>, T. Lai<sup>1</sup>, D. Sanna<sup>1,4</sup>, I. Azzena<sup>2</sup>, N. Fois<sup>3</sup>, M. Casu<sup>1,2</sup>

Genetic patterns in *Mugil cephalus* and implications for fisheries and aquaculture management

<sup>1</sup>Department of Sciences for Nature and Environmental Resources, University of Sassari, Sassari, Italy

<sup>2</sup>Department of Veterinary Medicine, University of Sassari, Sassari, Italy

<sup>3</sup>Dipartimento per la Ricerca nelle Produzioni Animali, Agris Sardegna, Olmedo (SS), Italy

<sup>4</sup> Department of Biomedical Sciences, University of Sassari, Sassari, Italy

**Corresponding author:**

Piero Cossu

Department of Veterinary Medicine

University of Sassari

Sassari (SS), Italy

[picossu@uniss.it](mailto:picossu@uniss.it)

ORCID: 0000-0002-8946-8261

**Table S1** Characteristics of the four coastal ponds. CAB = Cabras pond; MIS = Mistras pond; PPI = Porto Pino ponds; TOR = Tortoli pond

|                         | CAB          | MIS          | PPI          | TOR       |
|-------------------------|--------------|--------------|--------------|-----------|
| Tipology                | Non tidal    | Non tidal    | Non tidal    | Non tidal |
| Area (Km <sup>2</sup> ) | 22.3         | 4.50         | 5            | 2.89      |
| Mean Depth (m)          | 1.6          | 0.5          | 0.7          | 1.10      |
| Salinity <sup>(a)</sup> | Mesohaline   | Hyperhaline  | Hyperhaline  | Euhaline  |
| Trophic status          | Hypertrophic | Oligotrophic | Oligotrophic | Eutrophic |

(a) Based on mean annual salinity: classification of transitional waters follows the European Water Framework Directive 2000/60/EC: <0.5 ‰, Freshwater; <0.5 ‰ to <5 ‰, Oligohaline; 5 ‰ to 18 ‰, Mesohaline; 18 ‰ to <30 ‰, Polyhaline; 30 ‰ to <40 ‰, Euhaline; >40 ‰, Hyperhaline

**Table S2** Microsatellite loci used in this study.  $T_A$  = Annealing temperature of each primer ( $^{\circ}\text{C}$ ); C = primer concentration ( $\mu\text{M}$ ) in each PCR reaction;  $N_A$  = Number of alleles

| Locus       | Primer sequence                                                     | Fluorochrome | $T_A$ | C    | Multiplex | $N_A$ | Allele range size |
|-------------|---------------------------------------------------------------------|--------------|-------|------|-----------|-------|-------------------|
| Mce22       | F: ACGCATTGAGCAGACATGAACT<br>R: TGACCCTACGTACGTATCAG                | 6-FAM        | 50    | 0.08 | A         | 5     | 116-124           |
| Mce7        | F: GCCCCGAGATGGAGAAGA<br>R: AAGATGGAACAAGGCAAAGAG                   | PET          | 50    | 0.12 | A         | 20    | 174-248           |
| Mce14       | F: TAATACGATGTGCTTTGTCCC<br>R: CATAACCTCCACCTGCTGAC                 | 6-FAM        | 50    | 0.12 | A         | 14    | 154-190           |
| Mce6        | F: GAGGAGGCTCGGAGGATT<br>R: CGGGCTTGTGACAGTTT                       | VIC          | 50    | 0.12 | A         | 16    | 180-214           |
| Mce11       | F: ATTAGCCAGGGCCACCAG<br>R: CAGAAGCCAAAAGGACGG                      | VIC          | 58    | 0.06 | B         | 4     | 165-171           |
| Mce24       | F: AAAGTCTGAATGGAGCGCAG<br>R: TCCTGAATCTCTGGTGACAGC                 | PET          | 58    | 0.09 | B         | 22    | 119-179           |
| Mce25       | F: TCGGCATGTATATGAAAGCAC<br>R: ACATAACTCTGCCACTGCTTG                | NED          | 58    | 0.12 | B         | 34    | 123-241           |
| Mce3        | F: GGAGGACTAGGATTTTCGTG<br>R: CTTATCCCTGACCTTCTCAT                  | 6-FAM        | 50    | 0.08 |           | 10    | 137-177           |
| Mcs15A<br>M | F: GAGCCAAACTGGTCACATGAAAGAGA<br>R: ACTTTCAGTGACGCGCCAGTGTT         | VIC          | 60    | 0.14 | C         | 25    | 193-289           |
| Mcs15C<br>M | F: GGATTAGTGGCGGACTTCTGTGAA<br>R: CTCTTTCAATTATGTCAGTGGTATGGCTTC    | NED          | 60    | 0.12 | C         | 22    | 155- 61           |
| Mcs16D<br>M | F: CAAATACTAGATGCTTTGCACACCCTTAC<br>R: GGCCTACAGATTTCCCTTTATGCTAGGC | PET          | 60    | 0.11 | C         | 12    | 153-203           |
| Mcs1EH      | F: ACCGGGCTTTAGGCTGTTGGTCA<br>R: TGAGACACATCCCATCACTGCCTACG         | 6-FAM        | 60    | 0.10 | C         | 19    | 269-341           |
| Mcs2DM      | F: CATGGGCATCTTTATCGCTCTCAA<br>R: CAACTTAATTTCCCTTCGGGGATGA         | PET          | 56    | 0.12 | D         | 31    | 182-278           |
| Mcs2FH      | F: GCAGTGAAATAAACAGGCACCTCTCA<br>R: TGTGGGGTATGAAGTCCCTCTTGCTC      | 6-FAM        | 56    | 0.06 | D         | 26    | 187-267           |

**Table S3.** Allele frequencies of the 14 loci used in the present study. Private alleles are marked in bold. CAB = Cabras pond; MIS = Mistras pond; PPI = Porto Pino ponds; TOR = Tortoli pond

| Locus | Allele size | CAB   | MIS          | PPI          | TOR          |
|-------|-------------|-------|--------------|--------------|--------------|
| Mce22 |             |       |              |              |              |
|       | 116         | 0.029 | 0.088        | 0.149        | 0.070        |
|       | 118         | 0.788 | 0.794        | 0.628        | 0.680        |
|       | 120         | 0.154 | 0.103        | 0.213        | 0.220        |
|       | 122         | 0.019 | 0.015        |              | 0.010        |
|       | 124         | 0.010 |              | 0.011        | 0.020        |
| Mce7  |             |       |              |              |              |
|       | 174         |       | 0.015        | 0.010        | 0.010        |
|       | 176         | 0.010 | 0.015        | 0.010        |              |
|       | 184         | 0.010 |              |              |              |
|       | 188         |       | 0.044        | 0.010        | 0.060        |
|       | 190         | 0.644 | 0.574        | 0.625        | 0.640        |
|       | 192         | 0.058 | 0.059        | 0.083        | 0.030        |
|       | 194         | 0.154 | 0.162        | 0.156        | 0.170        |
|       | 196         | 0.038 | 0.029        | 0.021        | 0.030        |
|       | 197         |       |              |              | 0.010        |
|       | 207         |       |              | <b>0.010</b> |              |
|       | 220         | 0.019 |              |              |              |
|       | 222         | 0.010 |              |              | 0.020        |
|       | 224         | 0.010 | 0.029        |              |              |
|       | 226         | 0.010 |              | <b>0.010</b> |              |
|       | 230         | 0.010 | 0.015        |              |              |
|       | 236         | 0.019 | 0.044        | 0.031        | 0.020        |
|       | 238         |       | 0.015        |              |              |
|       | 239         |       |              | <b>0.021</b> |              |
|       | 242         | 0.010 |              | 0.010        |              |
|       | 247         |       |              |              | <b>0.010</b> |
| Mce14 |             |       |              |              |              |
|       | 154         |       | <b>0.015</b> |              |              |

| Locus | Allele size | CAB          | MIS   | PPI          | TOR          |
|-------|-------------|--------------|-------|--------------|--------------|
|       | 156         | 0.471        | 0.412 | 0.333        | 0.460        |
|       | 158         |              | 0.044 |              | 0.010        |
|       | 162         | 0.067        | 0.103 | 0.083        | 0.080        |
|       | 164         | 0.173        | 0.132 | 0.208        | 0.170        |
|       | 166         | 0.038        | 0.074 | 0.104        | 0.070        |
|       | 168         | <b>0.010</b> |       |              |              |
|       | 170         | 0.019        | 0.015 | 0.010        | 0.010        |
|       | 172         | 0.038        | 0.044 | 0.063        | 0.030        |
|       | 176         | 0.115        | 0.088 | 0.125        | 0.100        |
|       | 178         |              |       | <b>0.010</b> |              |
|       | 180         |              | 0.044 | 0.031        | 0.030        |
|       | 188         | 0.058        | 0.029 | 0.021        | 0.030        |
|       | 190         | 0.010        |       | 0.010        | 0.010        |
| Mce6  |             |              |       |              |              |
|       | 180         |              |       |              | <b>0.010</b> |
|       | 182         | 0.250        | 0.265 | 0.213        | 0.210        |
|       | 184         |              |       |              | 0.020        |
|       | 188         | 0.038        | 0.015 | 0.053        | 0.040        |
|       | 190         |              |       |              | 0.010        |
|       | 192         | 0.365        | 0.397 | 0.394        | 0.450        |
|       | 194         | 0.077        | 0.074 | 0.085        | 0.050        |
|       | 196         | 0.019        |       | 0.011        | 0.010        |
|       | 198         | 0.010        |       | 0.011        | 0.020        |
|       | 200         | 0.173        | 0.206 | 0.128        | 0.080        |
|       | 202         | 0.029        | 0.029 | 0.085        | 0.060        |
|       | 204         | 0.010        | 0.015 |              | 0.010        |
|       | 206         |              |       | 0.011        | 0.010        |
|       | 208         | <b>0.010</b> |       |              |              |
|       | 212         | <b>0.010</b> |       |              |              |
|       | 213         | <b>0.010</b> |       |              |              |

| Locus | Allele size  | CAB   | MIS   | PPI          | TOR   |
|-------|--------------|-------|-------|--------------|-------|
| Mce11 | 214          |       |       | 0.011        | 0.020 |
|       | 157          |       |       | <b>0.010</b> |       |
|       | 161          |       |       | <b>0.010</b> |       |
|       | 165          | 0.038 | 0.029 | 0.042        | 0.040 |
|       | 167          | 0.769 | 0.779 | 0.698        | 0.740 |
|       | 169          | 0.183 | 0.191 | 0.229        | 0.220 |
|       | 171          | 0.010 |       | 0.010        |       |
| Mce24 | 119          | 0.048 | 0.029 | 0.031        | 0.020 |
|       | 121          | 0.010 | 0.015 | 0.021        | 0.010 |
|       | 125          | 0.058 | 0.015 | 0.042        | 0.030 |
|       | 127          |       |       | <b>0.010</b> |       |
|       | 129          | 0.067 | 0.074 | 0.094        | 0.080 |
|       | 131          | 0.019 | 0.015 |              | 0.010 |
|       | 133          | 0.029 | 0.015 | 0.042        | 0.010 |
|       | 135          | 0.048 | 0.029 | 0.042        | 0.040 |
|       | 137          | 0.154 | 0.162 | 0.125        | 0.140 |
|       | 141          | 0.154 | 0.176 | 0.135        | 0.160 |
|       | 143          | 0.115 | 0.176 | 0.115        | 0.150 |
|       | 145          |       | 0.015 | 0.010        | 0.010 |
|       | 147          | 0.029 | 0.059 | 0.010        | 0.040 |
|       | 149          | 0.048 | 0.088 | 0.094        | 0.090 |
|       | 151          | 0.077 | 0.044 | 0.052        | 0.090 |
|       | 153          | 0.029 | 0.029 | 0.063        | 0.020 |
|       | 155          | 0.029 |       | 0.052        | 0.060 |
|       | 157          | 0.038 | 0.029 | 0.031        |       |
|       | 159          |       | 0.015 | 0.010        |       |
|       | 161          | 0.010 | 0.015 |              | 0.030 |
| 163   | <b>0.010</b> |       |       |              |       |

| Locus | Allele size | CAB          | MIS          | PPI          | TOR          |
|-------|-------------|--------------|--------------|--------------|--------------|
| Mce25 | 173         | 0.029        |              | 0.010        | 0.010        |
|       | 179         |              |              | <b>0.010</b> |              |
|       | 123         | 0.029        | 0.015        | 0.043        | 0.030        |
|       | 125         | 0.077        | 0.059        | 0.022        | 0.040        |
|       | 127         | 0.019        |              | 0.011        | 0.030        |
|       | 129         | <b>0.010</b> |              |              |              |
|       | 131         | 0.231        | 0.382        | 0.163        | 0.200        |
|       | 133         | 0.288        | 0.265        | 0.348        | 0.320        |
|       | 135         | 0.135        | 0.074        | 0.174        | 0.110        |
|       | 137         |              |              | <b>0.011</b> |              |
|       | 139         | 0.067        | 0.059        | 0.033        | 0.060        |
|       | 141         |              |              | 0.022        | 0.020        |
|       | 143         |              | 0.015        |              | 0.040        |
|       | 145         |              |              | 0.011        | 0.030        |
|       | 153         |              | <b>0.015</b> |              |              |
|       | 159         | <b>0.010</b> |              |              |              |
|       | 165         |              |              | <b>0.011</b> |              |
|       | 167         |              |              |              | <b>0.010</b> |
|       | 169         |              |              | <b>0.011</b> |              |
|       | 171         | 0.010        | 0.015        | 0.011        | 0.020        |
|       | 173         | 0.010        |              | 0.011        | 0.020        |
|       | 175         |              | 0.044        | 0.022        | 0.010        |
|       | 177         | 0.029        | 0.029        | 0.011        |              |
|       | 179         | <b>0.010</b> |              |              |              |
|       | 181         | 0.010        |              |              | 0.010        |
|       | 183         |              |              | 0.011        | 0.020        |
|       | 191         | 0.010        |              |              | 0.010        |
|       | 197         |              | <b>0.015</b> |              |              |
| 199   |             |              | <b>0.011</b> |              |              |

| Locus   | Allele size | CAB          | MIS          | PPI          | TOR          |
|---------|-------------|--------------|--------------|--------------|--------------|
|         | 203         |              |              | <b>0.011</b> |              |
|         | 205         | <b>0.010</b> |              |              |              |
|         | 209         |              | <b>0.015</b> |              |              |
|         | 211         |              |              | 0.011        | 0.010        |
|         | 213         |              |              |              | <b>0.010</b> |
|         | 217         | <b>0.010</b> |              |              |              |
|         | 219         | <b>0.010</b> |              |              |              |
|         | 225         | 0.029        |              | 0.011        |              |
|         | 231         |              |              | <b>0.011</b> |              |
|         | 235         |              |              | <b>0.011</b> |              |
|         | 241         |              |              | <b>0.011</b> |              |
| Mce3    |             |              |              |              |              |
|         | 137         |              | <b>0.015</b> |              |              |
|         | 139         | 0.010        |              | 0.021        |              |
|         | 145         |              | <b>0.030</b> |              |              |
|         | 147         | 0.096        | 0.106        | 0.063        | 0.100        |
|         | 149         | 0.808        | 0.803        | 0.844        | 0.800        |
|         | 151         | 0.077        | 0.030        | 0.052        | 0.070        |
|         | 153         |              |              |              | 0.020        |
|         | 155         | <b>0.010</b> |              |              |              |
|         | 157         |              |              | 0.010        | 0.010        |
|         | 159         |              |              | <b>0.010</b> |              |
|         | 177         |              | <b>0.015</b> |              |              |
| Mcs15AM |             |              |              |              |              |
|         | 193         |              |              | <b>0.021</b> |              |
|         | 197         | 0.029        |              |              | 0.010        |
|         | 201         | 0.019        |              |              | 0.010        |
|         | 205         |              |              | 0.011        | 0.020        |
|         | 209         | 0.019        | 0.029        | 0.032        | 0.010        |
|         | 213         |              | 0.074        | 0.043        | 0.010        |



| Locus   | Allele size | CAB          | MIS   | PPI          | TOR   |
|---------|-------------|--------------|-------|--------------|-------|
|         | 217         | 0.058        | 0.059 | 0.032        | 0.020 |
|         | 221         | 0.048        | 0.044 | 0.043        | 0.092 |
|         | 225         | 0.058        | 0.059 | 0.043        | 0.020 |
|         | 229         | 0.058        | 0.029 | 0.074        | 0.143 |
|         | 233         | 0.048        | 0.059 | 0.117        | 0.051 |
|         | 237         | 0.067        | 0.191 | 0.128        | 0.102 |
|         | 241         | 0.087        | 0.059 | 0.085        | 0.102 |
|         | 245         | 0.144        | 0.044 | 0.149        | 0.102 |
|         | 249         | 0.096        | 0.074 | 0.043        | 0.041 |
|         | 253         | 0.058        | 0.029 | 0.043        | 0.041 |
|         | 257         | 0.038        | 0.074 | 0.032        | 0.041 |
|         | 261         | 0.058        | 0.074 | 0.043        | 0.041 |
|         | 265         | 0.010        | 0.015 | 0.053        | 0.051 |
|         | 269         | 0.029        | 0.044 |              | 0.031 |
|         | 273         | 0.019        | 0.029 |              | 0.020 |
|         | 277         | 0.029        | 0.015 |              |       |
|         | 281         |              |       | 0.011        | 0.010 |
|         | 285         | 0.010        |       |              | 0.020 |
|         | 289         | 0.010        |       |              | 0.010 |
|         | 333         | <b>0.010</b> |       |              |       |
| Mcs15CM |             |              |       |              |       |
|         | 155         | 0.298        | 0.250 | 0.260        | 0.150 |
|         | 159         | 0.038        |       | 0.031        | 0.030 |
|         | 163         | 0.010        | 0.029 | 0.021        |       |
|         | 167         |              |       | <b>0.010</b> |       |
|         | 171         |              | 0.015 | 0.010        | 0.010 |
|         | 175         | 0.010        |       |              | 0.020 |
|         | 179         | 0.010        | 0.015 | 0.052        | 0.020 |
|         | 183         | 0.038        | 0.015 | 0.042        | 0.030 |
|         | 187         | 0.038        | 0.015 | 0.052        | 0.060 |

| Locus   | Allele size | CAB          | MIS   | PPI          | TOR   |
|---------|-------------|--------------|-------|--------------|-------|
|         | 191         | 0.106        | 0.088 | 0.083        | 0.120 |
|         | 195         | 0.048        | 0.059 | 0.063        | 0.080 |
|         | 199         | 0.077        | 0.044 | 0.104        | 0.080 |
|         | 203         | 0.087        | 0.103 | 0.031        | 0.110 |
|         | 207         | 0.125        | 0.162 | 0.125        | 0.040 |
|         | 211         | 0.058        | 0.074 | 0.031        | 0.060 |
|         | 215         | 0.019        | 0.044 | 0.031        | 0.070 |
|         | 219         |              | 0.059 | 0.010        | 0.040 |
|         | 223         | 0.038        | 0.015 | 0.021        | 0.040 |
|         | 227         |              |       |              | 0.010 |
|         | 231         |              | 0.015 | 0.021        | 0.010 |
|         | 245         |              |       |              | 0.010 |
|         | 261         |              |       |              | 0.010 |
| Mcs16DM |             |              |       |              |       |
|         | 145         |              |       | <b>0.010</b> |       |
|         | 153         | 0.240        | 0.279 | 0.125        | 0.210 |
|         | 157         |              |       | <b>0.010</b> |       |
|         | 161         | 0.048        | 0.029 | 0.104        | 0.090 |
|         | 165         | 0.019        | 0.088 | 0.052        | 0.090 |
|         | 169         | 0.010        | 0.059 | 0.010        |       |
|         | 173         | 0.231        | 0.162 | 0.240        | 0.230 |
|         | 177         | 0.269        | 0.294 | 0.240        | 0.250 |
|         | 181         | 0.106        | 0.044 | 0.156        | 0.080 |
|         | 185         | 0.038        | 0.015 | 0.010        | 0.020 |
|         | 189         | 0.019        |       | 0.021        | 0.010 |
|         | 197         |              | 0.015 |              | 0.010 |
|         | 201         |              | 0.015 | 0.021        | 0.010 |
|         | 203         | <b>0.019</b> |       |              |       |
| Mcs1EH  |             |              |       |              |       |
|         | 269         | 0.010        | 0.015 | 0.011        | 0.010 |

| Locus  | Allele size | CAB          | MIS   | PPI   | TOR   |
|--------|-------------|--------------|-------|-------|-------|
|        | 273         |              | 0.015 | 0.043 |       |
|        | 277         | 0.173        | 0.103 | 0.096 | 0.100 |
|        | 281         | 0.106        | 0.176 | 0.128 | 0.180 |
|        | 285         | 0.058        | 0.103 | 0.085 | 0.050 |
|        | 289         | 0.087        | 0.176 | 0.096 | 0.060 |
|        | 293         | 0.029        | 0.015 | 0.064 | 0.030 |
|        | 297         | 0.096        | 0.132 | 0.128 | 0.160 |
|        | 301         | 0.087        | 0.059 | 0.053 | 0.060 |
|        | 305         | 0.067        | 0.044 | 0.053 | 0.060 |
|        | 309         | 0.106        | 0.044 | 0.074 | 0.070 |
|        | 313         | 0.010        | 0.015 | 0.043 | 0.060 |
|        | 317         | 0.029        | 0.029 | 0.032 | 0.070 |
|        | 321         | 0.038        | 0.015 | 0.021 | 0.040 |
|        | 325         | 0.067        |       | 0.021 | 0.040 |
|        | 329         | 0.029        | 0.029 | 0.011 | 0.010 |
|        | 333         | 0.010        |       | 0.011 |       |
|        | 337         |              |       | 0.011 |       |
|        | 341         |              | 0.029 | 0.021 |       |
| McS2DM |             |              |       |       |       |
|        | 182         | <b>0.010</b> |       |       |       |
|        | 194         | 0.010        |       | 0.010 | 0.020 |
|        | 198         |              |       | 0.010 | 0.020 |
|        | 204         |              | 0.015 | 0.010 |       |
|        | 206         | 0.019        | 0.029 | 0.042 | 0.030 |
|        | 210         | 0.029        | 0.059 | 0.052 | 0.110 |
|        | 212         |              | 0.015 | 0.010 |       |
|        | 214         | 0.087        | 0.059 | 0.083 | 0.070 |
|        | 216         |              |       | 0.010 | 0.010 |
|        | 218         | 0.058        | 0.044 | 0.031 | 0.060 |
|        | 220         |              | 0.015 | 0.031 |       |

| Locus  | Allele size | CAB          | MIS   | PPI          | TOR   |
|--------|-------------|--------------|-------|--------------|-------|
|        | 222         | 0.029        | 0.059 | 0.031        | 0.090 |
|        | 226         | 0.087        | 0.088 |              | 0.020 |
|        | 228         |              | 0.015 | 0.021        |       |
|        | 230         | 0.106        | 0.132 | 0.042        | 0.050 |
|        | 232         |              |       | <b>0.031</b> |       |
|        | 234         | 0.125        | 0.118 | 0.052        | 0.090 |
|        | 236         |              |       | <b>0.031</b> |       |
|        | 238         | 0.115        | 0.044 | 0.021        | 0.060 |
|        | 240         |              |       | <b>0.010</b> |       |
|        | 242         | 0.048        | 0.044 | 0.094        | 0.090 |
|        | 244         | 0.010        | 0.015 | 0.073        | 0.010 |
|        | 246         | 0.067        | 0.074 | 0.021        | 0.080 |
|        | 248         |              |       | <b>0.021</b> |       |
|        | 250         | 0.048        | 0.059 | 0.031        | 0.030 |
|        | 252         | 0.010        |       | 0.031        |       |
|        | 254         | 0.058        | 0.015 | 0.052        | 0.020 |
|        | 255         |              |       | <b>0.010</b> |       |
|        | 258         | 0.029        | 0.015 | 0.042        | 0.030 |
|        | 262         | 0.010        |       | 0.021        | 0.020 |
|        | 264         | 0.010        |       | 0.010        | 0.050 |
|        | 266         | 0.019        | 0.044 | 0.031        | 0.010 |
|        | 270         | 0.010        | 0.015 | 0.021        | 0.030 |
|        | 274         |              | 0.029 | 0.010        |       |
|        | 278         | <b>0.010</b> |       |              |       |
| Mcs2FH |             |              |       |              |       |
|        | 187         | 0.010        | 0.015 |              | 0.020 |
|        | 193         | 0.096        | 0.118 | 0.073        | 0.110 |
|        | 195         | 0.308        | 0.250 | 0.302        | 0.250 |
|        | 197         | 0.010        | 0.044 | 0.052        | 0.010 |
|        | 199         | 0.029        | 0.103 | 0.063        | 0.050 |

| Locus | Allele size | CAB          | MIS          | PPI          | TOR   |
|-------|-------------|--------------|--------------|--------------|-------|
|       | 201         | 0.038        |              | 0.010        | 0.020 |
|       | 203         | <b>0.038</b> |              |              |       |
|       | 205         |              |              | 0.021        | 0.010 |
|       | 207         | 0.019        |              | 0.021        | 0.020 |
|       | 211         | 0.010        |              | 0.042        | 0.010 |
|       | 215         | 0.038        | 0.015        | 0.010        | 0.030 |
|       | 219         | 0.019        | 0.059        | 0.010        | 0.020 |
|       | 221         |              |              | <b>0.021</b> |       |
|       | 223         | 0.038        |              | 0.042        | 0.110 |
|       | 227         | 0.058        | 0.029        | 0.010        | 0.070 |
|       | 229         |              |              | <b>0.021</b> |       |
|       | 231         | 0.077        | 0.074        | 0.063        | 0.070 |
|       | 233         |              |              | <b>0.021</b> |       |
|       | 235         | 0.058        | 0.059        | 0.063        | 0.060 |
|       | 237         |              | 0.015        | 0.021        |       |
|       | 239         | 0.019        | 0.044        | 0.063        | 0.030 |
|       | 241         |              | 0.015        | 0.010        |       |
|       | 243         | 0.010        | 0.015        | 0.031        | 0.020 |
|       | 245         |              | <b>0.015</b> |              |       |
|       | 247         | 0.058        | 0.044        | 0.021        | 0.030 |
|       | 251         | 0.019        | 0.059        | 0.010        | 0.040 |
|       | 255         | 0.019        | 0.015        |              | 0.020 |
|       | 259         | <b>0.019</b> |              |              |       |
|       | 263         | <b>0.010</b> |              |              |       |
|       | 267         |              | <b>0.015</b> |              |       |

**Table S4** Summary statistics of within population genetic variation for each locus and population of *Mugil cephalus*.  $A$  = Number of alleles;  $A_R$  = Allelic richness;  $H_O$  = Observed heterozygosity;  $H_E$  = Expected heterozygosity;  $F_{IS}$  = Inbreeding coefficient;  $HWP_D$  = probability of departure from Hardy-Weinberg proportions because of heterozygote deficit;  $HWP_E$  = probability of departure from Hardy-Weinberg proportions because of heterozygote excess;  $F_{IS}$  Low = 95% confidence interval lower limit of inbreeding coefficient;  $F_{IS}$  High = 95% confidence interval upper limit of inbreeding coefficient.  $P$ -values with  $P < 0.05$  are outlined in bold. For population labels see Table S3

|                | Mce7   | Mce14  | Mce6   | Mce11  | Mce24       | Mcs15AM | Mcs15CM | Mcs1EH | Mcs2DM | Mcs2FH      |
|----------------|--------|--------|--------|--------|-------------|---------|---------|--------|--------|-------------|
| <b>CAB</b>     |        |        |        |        |             |         |         |        |        |             |
| $A$            | 13     | 10     | 12     | 4      | 19          | 22      | 15      | 16     | 23     | 22          |
| $A_R$          | 8.74   | 8.48   | 8.94   | 3.42   | 16.37       | 18.37   | 12.9    | 13.88  | 17.93  | 17.33       |
| $H_O$          | 0.58   | 0.75   | 0.79   | 0.42   | 0.87        | 0.92    | 0.81    | 0.92   | 0.88   | 0.92        |
| $H_E$          | 0.56   | 0.72   | 0.76   | 0.37   | 0.91        | 0.93    | 0.86    | 0.91   | 0.93   | 0.87        |
| $HWP_D$        | 0.66   | 0.24   | 0.43   | 0.87   | 0.20        | 0.12    | 0.45    | 0.21   | 0.23   | 0.95        |
| $HWP_E$        | 0.42   | 0.76   | 0.57   | 0.22   | 0.81        | 0.88    | 0.55    | 0.79   | 0.76   | 0.10        |
| $F_{IS}$       | -0.039 | -0.037 | -0.031 | -0.133 | 0.051       | 0.009   | 0.059   | -0.018 | 0.044  | -0.060      |
| $F_{IS\_Low}$  | -0.176 | -0.170 | -0.162 | -0.283 | -0.038      | -0.063  | -0.034  | -0.093 | -0.040 | -0.123      |
| $F_{IS\_High}$ | 0.110  | 0.101  | 0.112  | 0.071  | 0.153       | 0.094   | 0.166   | 0.071  | 0.139  | 0.006       |
| <b>MIS</b>     |        |        |        |        |             |         |         |        |        |             |
| $A$            | 11     | 11     | 7      | 3      | 18          | 18      | 16      | 16     | 22     | 19          |
| $A_R$          | 9.14   | 10     | 6.15   | 2.89   | 14.87       | 16.52   | 13.59   | 13.71  | 18.7   | 15.8        |
| $H_O$          | 0.65   | 0.85   | 0.79   | 0.38   | 0.88        | 0.91    | 0.97    | 0.79   | 0.97   | 0.88        |
| $H_E$          | 0.63   | 0.78   | 0.72   | 0.36   | 0.89        | 0.92    | 0.87    | 0.89   | 0.93   | 0.89        |
| $HWP_D$        | 0.16   | 0.94   | 0.72   | 0.76   | 0.06        | 0.32    | 0.98    | 0.10   | 0.79   | 0.09        |
| $HWP_E$        | 0.85   | 0.12   | 0.27   | 0.50   | 0.93        | 0.69    | 0.05    | 0.90   | 0.28   | 0.91        |
| $F_{IS}$       | -0.019 | -0.091 | -0.098 | -0.077 | 0.006       | 0.007   | -0.110  | 0.106  | -0.043 | 0.007       |
| $F_{IS\_Low}$  | -0.186 | -0.200 | -0.287 | -0.295 | -0.116      | -0.078  | -0.165  | -0.036 | -0.091 | -0.115      |
| $F_{IS\_High}$ | 0.164  | 0.021  | 0.098  | 0.222  | 0.143       | 0.111   | -0.044  | 0.258  | 0.025  | 0.142       |
| <b>PPI</b>     |        |        |        |        |             |         |         |        |        |             |
| $A$            | 12     | 11     | 10     | 6      | 20          | 18      | 18      | 19     | 32     | 23          |
| $A_R$          | 8.5    | 9.18   | 7.99   | 4.47   | 16.22       | 15.98   | 15.24   | 16.04  | 24.86  | 18.11       |
| $H_O$          | 0.58   | 0.88   | 0.79   | 0.5    | 0.88        | 0.94    | 0.85    | 0.98   | 0.96   | 0.98        |
| $H_E$          | 0.58   | 0.81   | 0.77   | 0.46   | 0.92        | 0.92    | 0.88    | 0.92   | 0.95   | 0.88        |
| $HWP_D$        | 0.29   | 0.70   | 0.40   | 0.84   | <b>0.02</b> | 0.22    | 0.23    | 0.98   | 0.24   | 0.99        |
| $HWP_E$        | 0.74   | 0.31   | 0.61   | 0.20   | 0.98        | 0.79    | 0.77    | 0.07   | 0.79   | <b>0.01</b> |
| $F_{IS}$       | -0.014 | -0.085 | -0.028 | -0.091 | 0.047       | -0.020  | 0.032   | -0.064 | -0.004 | -0.117      |
| $F_{IS\_Low}$  | -0.178 | -0.186 | -0.160 | -0.277 | -0.050      | -0.093  | -0.060  | -0.100 | -0.055 | -0.175      |
| $F_{IS\_High}$ | 0.169  | 0.029  | 0.114  | 0.108  | 0.157       | 0.069   | 0.134   | -0.013 | 0.063  | -0.062      |
| <b>TOR</b>     |        |        |        |        |             |         |         |        |        |             |
| $A$            | 10     | 11     | 14     | 3      | 18          | 23      | 20      | 15     | 22     | 20          |
| $A_R$          | 7.72   | 9.15   | 10.33  | 2.96   | 14.59       | 18.35   | 16.51   | 13.65  | 18.66  | 16.4        |
| $H_O$          | 0.6    | 0.82   | 0.66   | 0.36   | 0.88        | 0.9     | 0.9     | 0.88   | 0.94   | 0.94        |
| $H_E$          | 0.55   | 0.74   | 0.74   | 0.4    | 0.9         | 0.92    | 0.92    | 0.9    | 0.93   | 0.89        |

|                            |        |        |                 |        |        |        |        |        |        |        |
|----------------------------|--------|--------|-----------------|--------|--------|--------|--------|--------|--------|--------|
| <i>HWP<sub>D</sub></i>     | 0.93   | 0.96   | <b>&lt;0.01</b> | 0.26   | 0.29   | 0.19   | 0.26   | 0.30   | 0.57   | 0.54   |
| <i>HWP<sub>E</sub></i>     | 0.11   | 0.05   | 0.99            | 0.78   | 0.71   | 0.82   | 0.74   | 0.70   | 0.44   | 0.46   |
| <i>F<sub>IS</sub></i>      | -0.081 | -0.115 | 0.105           | 0.105  | 0.022  | 0.029  | 0.020  | 0.023  | -0.006 | -0.056 |
| <i>F<sub>IS_Low</sub></i>  | -0.200 | -0.223 | -0.041          | -0.129 | -0.069 | -0.052 | -0.062 | -0.064 | -0.067 | -0.130 |
| <i>F<sub>IS_High</sub></i> | 0.042  | -0.002 | 0.256           | 0.360  | 0.126  | 0.122  | 0.116  | 0.125  | 0.066  | 0.030  |

---

**Table S5.** Estimated null allele frequencies for each locus based on Brookfield's (1996) and Dempster's (1977) methods. Null allele frequencies >0.08 are outlined in bold. For population labels see Table S3

|         | CAB          |              | MIS          |              | PPI          |          | TOR          |              |
|---------|--------------|--------------|--------------|--------------|--------------|----------|--------------|--------------|
|         | Brookfield   | Dempster     | Brookfield   | Dempster     | Brookfield   | Dempster | Brookfield   | Dempster     |
| Mce22   | 0.034        | 0.045        | <b>0.085</b> | <b>0.116</b> | <b>0.122</b> | 0.060    | 0.003        |              |
| Mce7    |              |              |              | 0.013        |              |          |              |              |
| Mce14   |              | 0.006        |              |              |              |          |              |              |
| Mce6    |              |              |              |              | 0.062        |          | 0.045        | 0.045        |
| Mce11   |              |              |              |              |              |          | 0.030        | 0.017        |
| Mce24   | 0.025        | 0.012        | 0.003        | 0.022        | 0.022        | 0.030    | 0.010        |              |
| Mce25   | <b>0.118</b> | <b>0.116</b> |              |              | <b>0.163</b> | 0.047    | <b>0.084</b> | <b>0.092</b> |
| Mce3    | <b>0.105</b> | <b>0.126</b> | <b>0.210</b> | <b>0.141</b> | 0.024        | 0.036    | 0.079        | <b>0.116</b> |
| Mcs15AM | 0.004        | 0.011        | 0.003        |              | 0.042        | 0.005    | 0.058        | 0.004        |
| Mcs15CM | 0.027        |              |              |              | 0.015        | 0.005    | 0.009        | 0.003        |
| Mcs16DM |              |              |              |              |              |          |              |              |
| Mcs1EH  |              | 0.005        | 0.050        | 0.037        | 0.027        |          | 0.011        | 0.004        |
| Mcs2DM  | 0.021        | 0.003        |              |              |              | 0.002    |              |              |
| Mcs2FH  |              |              | 0.003        | 0.020        |              |          |              |              |



**Table S6** Pairwise population differentiation estimated using Jost's  $D_{EST}$ . Observed values are reported below the diagonal. Lower and upper limits of 95% confidence intervals based on 10'000 bootstraps are reported within brackets above the diagonal. Values outlined in bold indicate population pairs showing significant genetic divergence based on the Fisher's exact test for genetic homogeneity of genotype frequencies. Due to multiple testing, probability values were adjusted using the False Discovery Rate (FDR) method (Benjamini and Yekutieli 2001). For population labels see Table S3

|     | CAB    | MIS               | PPI               | TOR               |
|-----|--------|-------------------|-------------------|-------------------|
| CAB | —      | (-0.0220, 0.0323) | (-0.0178, 0.0250) | (-0.0201, 0.0291) |
| MIS | 0.000  | —                 | (-0.0253, 0.0360) | (-0.0269, 0.0367) |
| PPI | 0.0004 | 0.0002            | —                 | (-0.0241, 0.0329) |
| TOR | 0.0015 | 0.0011            | 0.0002            | —                 |

**Table S7** Bayesian clustering results.  $K$  = number of tested genetic clusters; mean  $\ln(\text{PD})$  = natural logarithm of posterior probability of data averaged over runs; SD  $\ln(\text{PD})$  = Standard Deviation of natural logarithm of posterior probability of data; Min  $\ln(\text{PD})$  minimum value of natural logarithm of posterior probability of data; Max  $\ln(\text{PD})$  maximum value of natural logarithm of posterior probability of data. The most likely clustering solution is outlined in bold

| $K$      | Number of runs | Mean $\ln(\text{PD})$ | SD $\ln(\text{PD})$ | Min $\ln(\text{PD})$ | Max $\ln(\text{PD})$ |
|----------|----------------|-----------------------|---------------------|----------------------|----------------------|
| <b>1</b> | <b>10</b>      | <b>-8370.51</b>       | <b>1.22</b>         | <b>-8373.2</b>       | <b>-8369.1</b>       |
| 2        | 10             | -8691.91              | 196.03              | -9160.2              | -8370                |
| 3        | 10             | -9534.12              | 682.08              | -10919.7             | -8593.7              |
| 4        | 10             | -9296.91              | 449.83              | -10250.1             | -8813.2              |

**Table S8** Proportion of full-sibling and half-sibling dyads estimated in each population using the genotype sharing method implemented in Demerelate and the maximum likelihood method implemented in ML-Relate softwares, respectively

|     | Full-siblings (%) |                  | Half-siblings (%) |                  |
|-----|-------------------|------------------|-------------------|------------------|
|     | <i>Demerelate</i> | <i>ML-Relate</i> | <i>Demerelate</i> | <i>ML-Relate</i> |
| CAB | 0.98              | 0.38             | 33.79             | 7.16             |
| MIS | 1.29              | 1.08             | 23.87             | 4.73             |
| PPI | 0.35              | 0.27             | 24.29             | 5.59             |
| TOR | 0.49              | 0.33             | 31.02             | 6.61             |
